# Supplementary material for: Deep2Full: Evaluating strategies for selecting the minimal mutational experiments for optimal computational predictions of deep mutational scan outcomes
Source: PubMed Central journal article supplement (PMC6954071; doi:10.1371/journal.pone.0227621), 2020-01-10
Supplement: pone.0227621.s001.pdf [file pone.0227621.s001.pdf]

## Supplementary Information

Deep2Full: Evaluating strategies for selecting the  
minimal mutational experiments for optimal  
computational predictions of deep mutational scan  
outcomes

C. K. Sruthi<sup>1</sup> and Meher K. Prakash<sup>1\*</sup>

*Theoretical Sciences Unit, Jawaharlal Nehru Centre for Advanced Scientific Research*

*Bangalore-560064, India*

# Tables

| Scan / Protein     | RMSD       |            |            |            |                | Pearson correlation |            |            |            |                |
|--------------------|------------|------------|------------|------------|----------------|---------------------|------------|------------|------------|----------------|
|                    | Random 15% | Random 25% | Random 50% | Random 85% | SNS-Random 25% | Random 15%          | Random 25% | Random 50% | Random 85% | SNS-Random 25% |
| $\beta$ -lactamase | 0.67       | 0.64       | 0.57       | 0.54       | 0.65           | 0.81                | 0.83       | 0.87       | 0.89       | 0.83           |
| APH(3')-II         | 1.11       | 1.12       | 1.05       | 0.98       | 1.18           | 0.69                | 0.68       | 0.72       | 0.78       | 0.68           |
| Hsp90              | 0.22       | 0.20       | 0.19       | 0.17       | 0.21           | 0.72                | 0.77       | 0.82       | 0.85       | 0.75           |
| MAPK1              | 0.41       | 0.40       | 0.35       | 0.33       | 0.42           | 0.62                | 0.63       | 0.74       | 0.77       | 0.63           |
| UBE2I              | 0.33       | 0.30       | 0.28       | 0.27       | 0.30           | 0.52                | 0.59       | 0.66       | 0.67       | 0.61           |
| TPK1               | 0.39       | 0.39       | 0.38       | 0.35       | 0.42           | 0.24                | 0.23       | 0.26       | 0.42       | 0.24           |

**Table 1.** RMSD and Pearson correlation for the test set of scans varying the number of training data points.

| Scan / Protein     | RMSD     |            |                     |                      |                 | Pearson correlation |            |                     |                      |                 |
|--------------------|----------|------------|---------------------|----------------------|-----------------|---------------------|------------|---------------------|----------------------|-----------------|
|                    | ANH Scan | Random 15% | Position range scan | WT residue type scan | SASA range scan | ANH Scan            | Random 15% | Position range scan | WT residue type scan | SASA range scan |
| $\beta$ -lactamase | 0.71     | 0.67       | 0.92                | 0.90                 | 1.03            | 0.80                | 0.81       | 0.65                | 0.67                 | 0.53            |
| APH(3')-II         | 1.13     | 1.11       | 1.32                | 1.31                 | 1.39            | 0.67                | 0.69       | 0.52                | 0.54                 | 0.49            |
| Hsp90              | 0.22     | 0.22       | 0.39                | 0.31                 | 0.33            | 0.75                | 0.72       | 0.30                | 0.37                 | 0.50            |
| MAPK1              | 0.42     | 0.41       | 0.57                | 0.52                 | 0.55            | 0.62                | 0.62       | 0.31                | 0.39                 | 0.33            |
| UBE2I              | 0.31     | 0.33       | 0.46                | 0.40                 | 0.41            | 0.56                | 0.52       | 0.20                | 0.32                 | 0.31            |
| TPK1               | 0.39     | 0.39       | 0.45                | 0.40                 | 0.43            | 0.25                | 0.24       | 0.13                | 0.19                 | 0.10            |

**Table 2.** RMSD and Pearson correlation for the test set of the 15% scans.

| Variable               | Pearson correlation with EVmutation |
|------------------------|-------------------------------------|
| Conservation           | -0.49                               |
| SASA                   | 0.39                                |
| Contacts               | -0.36                               |
| Average commutetime    | 0.34                                |
| Average co-evolution   | -0.32                               |
| Closeness centrality   | -0.27                               |
| Eigenvector centrality | -0.25                               |
| Degree centrality      | -0.23                               |

**Table 3.** Table showing the Pearson correlation of different variables that was considered in our study as inputs for the neural network with the EVmutation score. Negative values indicate anti-correlation.

|                    | Pearson correlation |          | RMSD       |             |
|--------------------|---------------------|----------|------------|-------------|
|                    | Random 85%          | Envision | Random 85% | Roth et al. |
| $\beta$ -lactamase | 0.89                | 0.85     | 0.54       | -           |
| APH(3')-II         | 0.78                | 0.84     | 0.98       | -           |
| Hsp90              | 0.85                | 0.76     | 0.17       | -           |
| UBE2I              | 0.67                | -        | 0.27       | 0.24        |
| TPK1               | 0.42                | -        | 0.35       | 0.34        |

**Table 4.** Comparison of prediction quality of Deep2Full with other methods which used partial deep scan data to complete the map. For Envision the Pearson correlation for the test set of individual protein models developed by training on 80% of deep mutational scan data was obtained from Figure 2 of *Gray et al.*<sup>1</sup>.

| Protein            | Spearman correlation |            |       |          |          |            |            |            |            |
|--------------------|----------------------|------------|-------|----------|----------|------------|------------|------------|------------|
|                    | Deep-Sequence        | EVmutation | SNAP2 | Envision | ANH scan | Random 15% | Random 25% | Random 50% | Random 85% |
| $\beta$ -lactamase | 0.78                 | 0.72       | 0.71  | 0.74*    | 0.80     | 0.81       | 0.83       | 0.86       | 0.88       |
| APH(3')-II         | 0.59                 | 0.54       | 0.49  | 0.64*    | 0.67     | 0.68       | 0.67       | 0.72       | 0.77       |
| Hsp90              | 0.53                 | 0.49       | 0.43  | 0.31*    | 0.53     | 0.56       | 0.59       | 0.65       | 0.70       |
| MAPK1              | -0.24                | -0.25      | 0.30  | -0.44    | 0.60     | 0.59       | 0.60       | 0.71       | 0.75       |
| UBE2I              | 0.55                 | 0.51       | -0.51 | 0.09     | 0.56     | 0.52       | 0.59       | 0.65       | 0.66       |
| TPK1               | 0.26                 | 0.25       | -0.22 | 0.27     | 0.25     | 0.24       | 0.24       | 0.26       | 0.42       |

**Table 5.** Comparison of prediction quality of our models with that of existing methods which do not use partial data for generating the model. For DeepSequence<sup>2</sup> and EVmutation<sup>3</sup>, the data was taken from the supplementary information of *Riesselman et al.*<sup>2</sup>. \*Extracted from the supplementary figure 8 on Leave-One-Protein-Out analysis of *Gray et al.*<sup>1</sup>.

| Scan / Protein | Random 85% | Random 50% | Random 25% | Random 15% | ANH scan | Position range scan | WT residue type scan | SASA range scan |
|----------------|------------|------------|------------|------------|----------|---------------------|----------------------|-----------------|
| blact          | 41         | 31         | 30         | 15         | 13       | 20                  | 20                   | 20              |
| agk            | 26         | 33         | 28         | 15         | 15       | 20                  | 12                   | 20              |
| hsp90          | 42         | 30         | 12         | 12         | 11       | 20                  | 9                    | 20              |
| mapk1          | 35         | 21         | 28         | 19         | 20       | 17                  | 15                   | 20              |
| ube2i          | 16         | 12         | 40         | 25         | 23       | 20                  | 14                   | 18              |
| tpk1           | 40         | 40         | 36         | 15         | 20       | 20                  | 15                   | 14              |

**Table 6.** Optimal number of hidden neurons for all proteins and scans

## References

- [1] Gray VE, Hause RJ, Luebeck J, Shendure J, Fowler DM. Quantitative missense variant effect prediction using large-scale mutagenesis data. *Cell systems*. 2018;6(1):116–124.
- [2] Riesselman AJ, Ingraham JB, Marks DS. Deep generative models of genetic variation capture the effects of mutations. *Nature Methods*. 2018;15(10):816+. doi:10.1038/s41592-018-0138-4.
- [3] Hopf TA, Ingraham JB, Poelwijk FJ, Scharfe CPI, Springer M, Sander C, et al. Mutation effects predicted from sequence co-variation. *Nature Biotechnology*. 2017;35(2):128–135. doi:10.1038/nbt.3769.
